# Supplementary material
Source: PubMed Central journal article supplement (PMC9202136)
Supplement: 12889_2022_13585_MOESM4_ESM.pdf [file 12889_2022_13585_MOESM4_ESM.pdf]

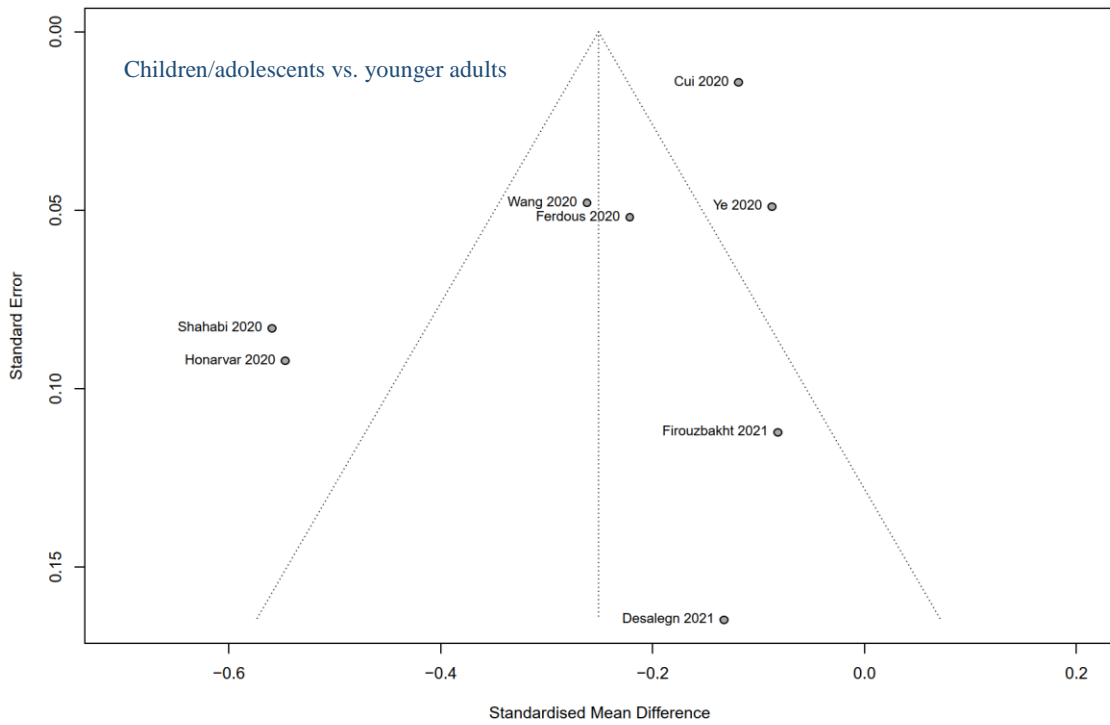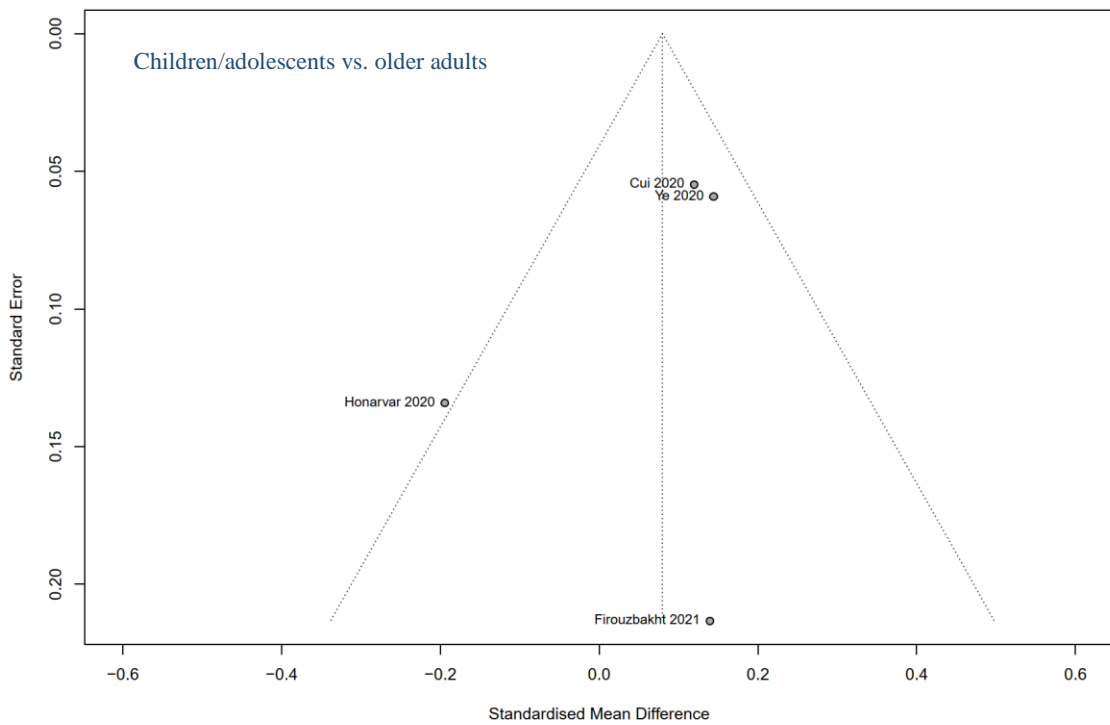

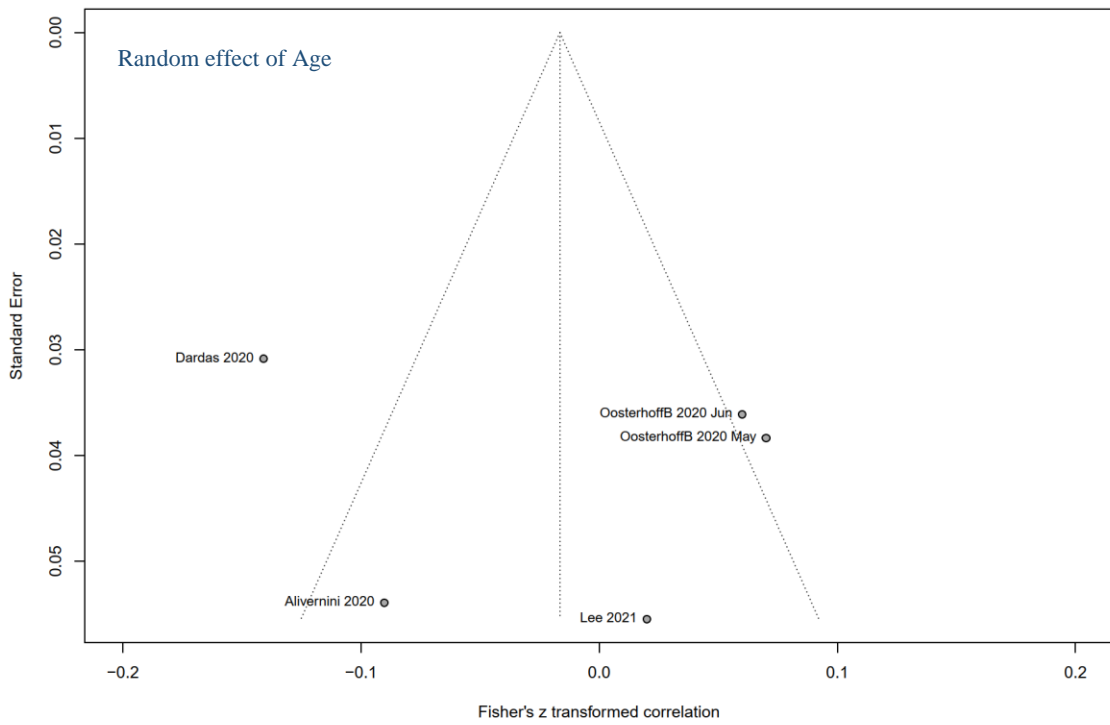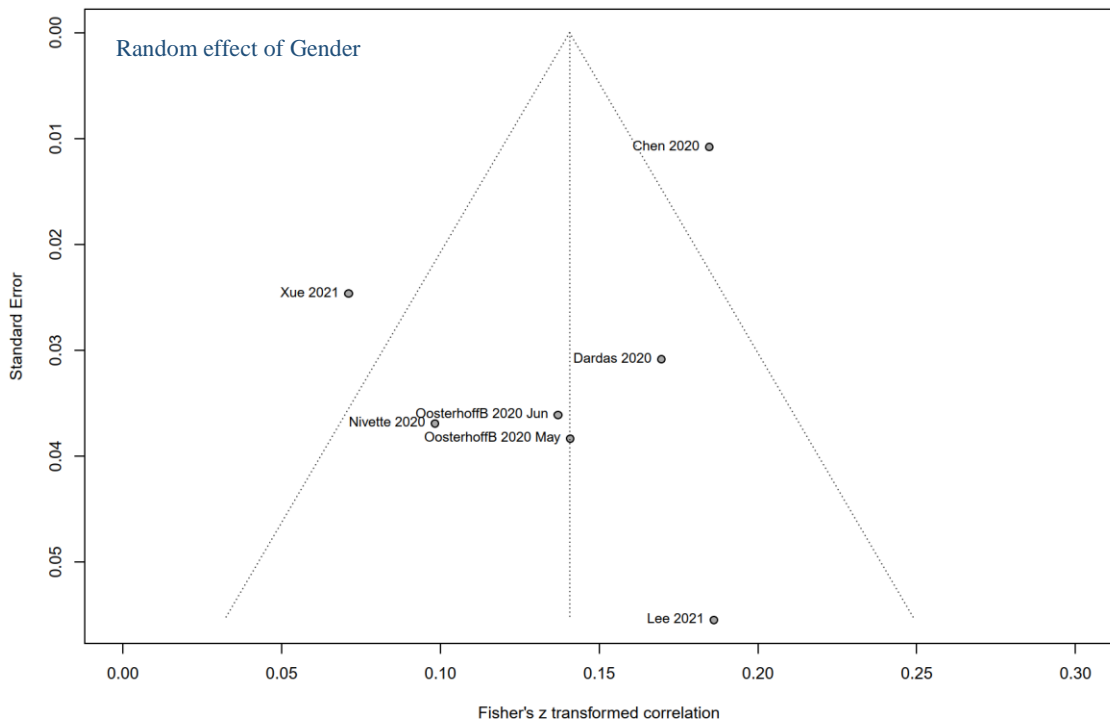

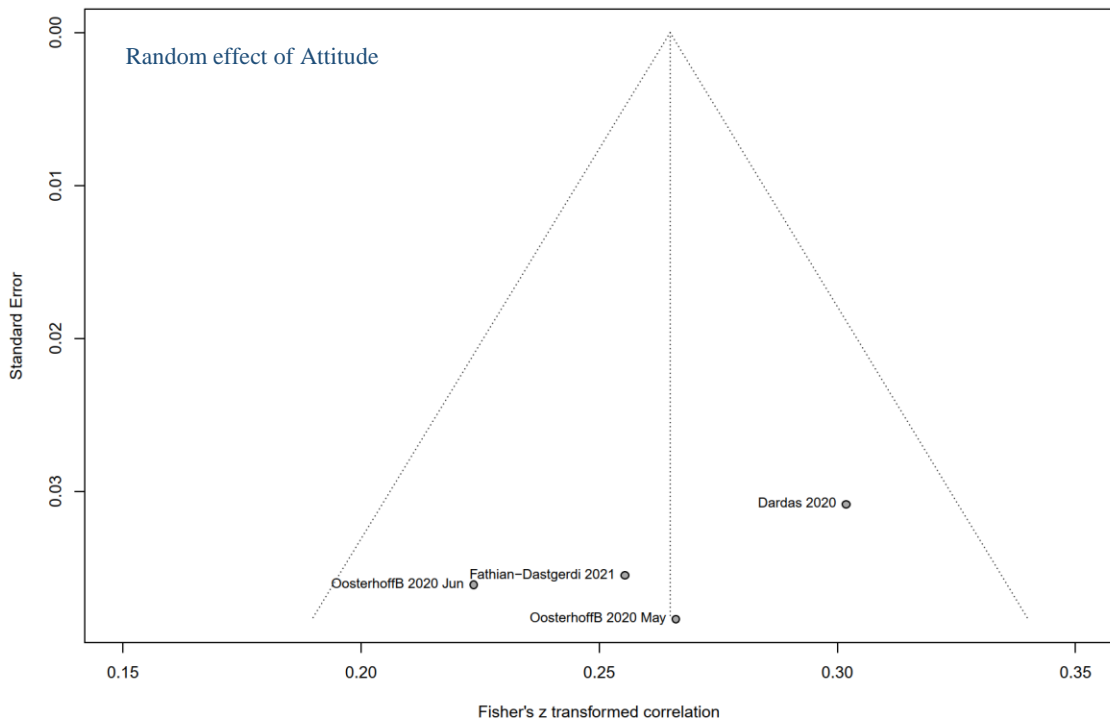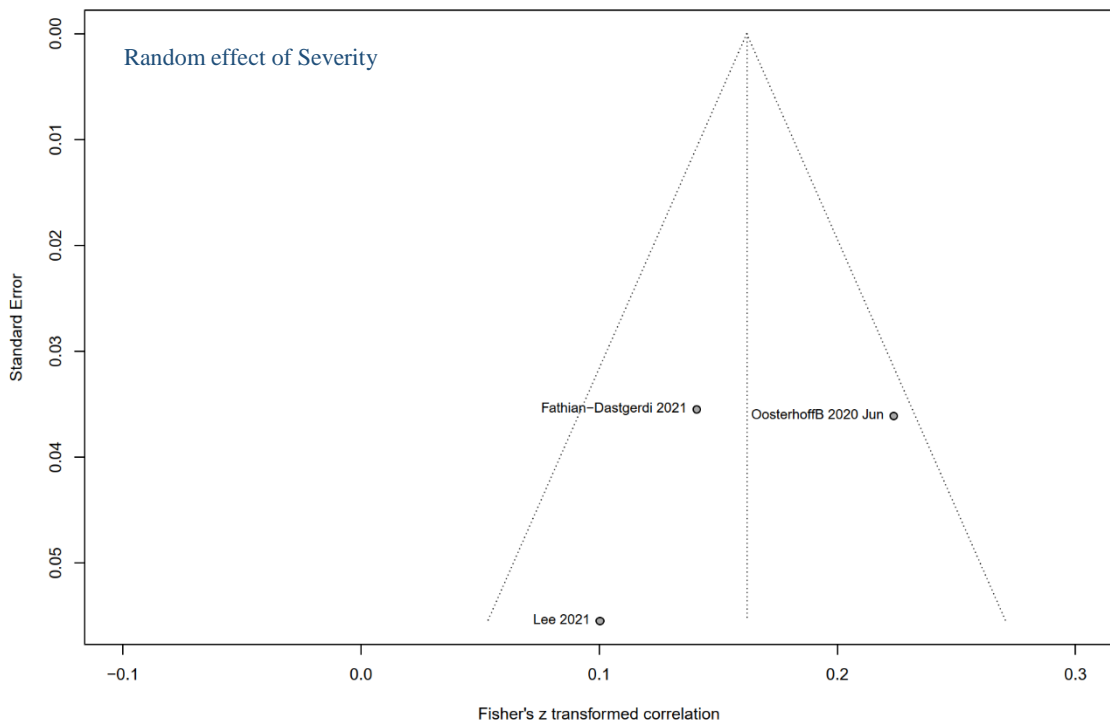

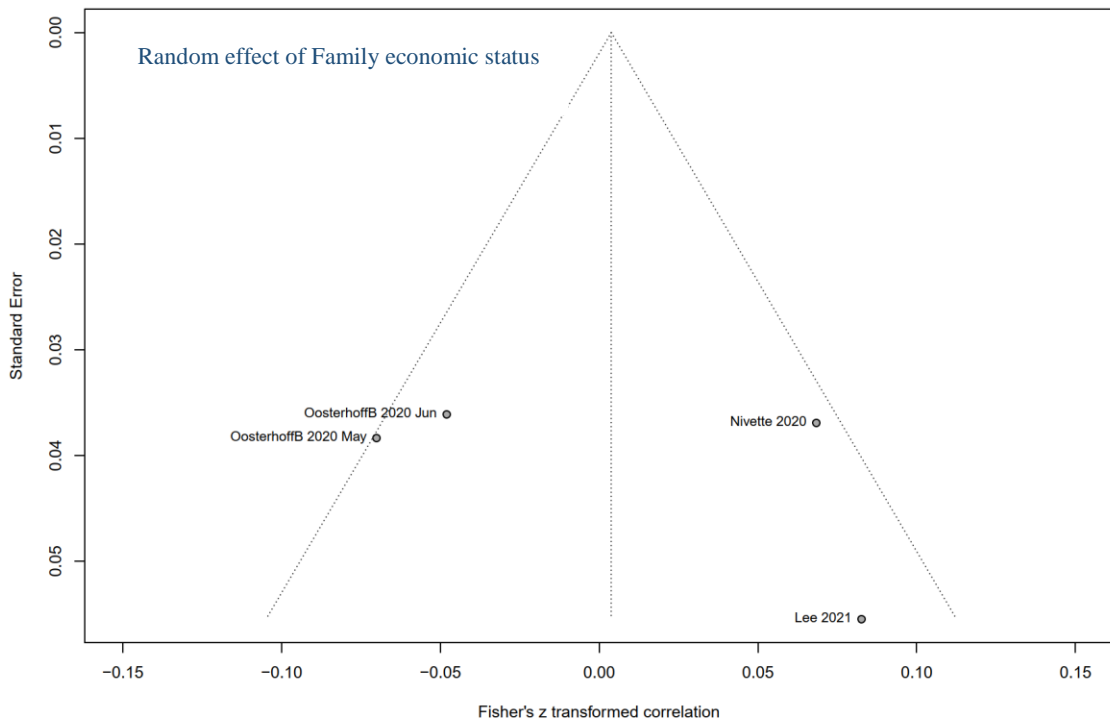

### **Fail-safe-N analyses:**

Children vs adult

Fail-safe N Calculation Using the Rosenthal Approach

Observed Significance Level: 0.0015

Target Significance Level: 0.05

Fail-safe N: 19

Average treatment effect [95% prediction interval]:

-0.2233 [-0.5686, 0.0900]

df.: 7

Average treatment effect [95% confidence interval]:

-0.2233 [-0.3896, -0.0695]

df.: 7

Children vs. older adult

Fail-safe N Calculation Using the Rosenthal Approach

Observed Significance Level: 0.3313

Target Significance Level: 0.05

Fail-safe N: 0

Average treatment effect [95% prediction interval]:

0.0836 [-0.3917, 0.5009]

df.: 3

Average treatment effect [95% confidence interval]:

0.0836 [-0.1535, 0.2930]

df.: 3

Age:

Fail-safe N Calculation Using the Rosenthal Approach

Observed Significance Level: 0.1426

Target Significance Level: 0.05

Fail-safe N: 0

Average treatment effect [95% prediction interval]:

-0.0162 [-0.4042, 0.3742]

df.: 4

Average treatment effect [95% confidence interval]:

-0.0162 [-0.1365, 0.1007]

df.: 4

Gender:

Fail-safe N Calculation Using the Rosenthal Approach

Observed Significance Level: <.0001

Target Significance Level: 0.05

Fail-safe N: 555

Average treatment effect [95% prediction interval]:

0.1400 [-0.0494, 0.3275]

df.: 6

Average treatment effect [95% confidence interval]:

0.1400 [0.0997, 0.1796]

df.: 6

Attitude:

Fail-safe N Calculation Using the Rosenthal Approach

Observed Significance Level: <.0001

Target Significance Level: 0.05

Fail-safe N: 332

Average treatment effect [95% prediction interval]:

0.2618 [0.1369, 0.3840]

df.: 3

Average treatment effect [95% confidence interval]:

0.2618 [0.2094, 0.3133]

df.: 3

Perceived severity

Fail-safe N Calculation Using the Rosenthal Approach

Observed Significance Level: <.0001

Target Significance Level: 0.05

Fail-safe N: 50

Average treatment effect [95% prediction interval]:

0.1550 [-0.1909, 0.5071]

df.: 2

Average treatment effect [95% confidence interval]:

0.1550 [-0.0090, 0.3123]

df.: 2
